# Supplementary material for: Ion exchange and intercalation properties of layered double hydroxides towards halide anions
Source: Royal Society of Chemistry journal article supplement (doi:10.1039/c4dt00620h), 2014-01-01
Supplement: c4dt00620h1.pdf [file c4dt00620h1.pdf]

## ELECTRONIC SUPPLEMENTARY INFORMATION FOR THE PAPER

### “Ion Exchange And Intercalation Properties Of Layered Double Hydroxides Towards Halide Anions”

#### EXPERIMENTAL

##### 1. Cl<sup>-</sup>/CO<sub>3</sub><sup>2-</sup> isotherm

To obtain the isotherm Cl<sup>-</sup>/ CO<sub>3</sub><sup>2-</sup> eleven samples were prepared by equilibrating, under stirring, 600 mg of [Zn<sub>0.61</sub>Al<sub>0.39</sub>(OH)<sub>2</sub>]Cl<sub>0.39</sub>·0.47H<sub>2</sub>O (ion exchange capacity of 3.65 mequiv/g) with 2.2, 4.4, 5.5, 6.6, 7.7, 8.8, 9.9, 11.0, 13.1, 16.4, 32.9 ml of 0.05 M of Na<sub>2</sub>CO<sub>3</sub> aqueous solution for 3 days at 25°C. The solids were recovered by centrifugation, washed three times with CO<sub>2</sub>-free deionized water and dried at 75% relative humidity (RH). The content of chloride anions in the solids was measured by ion chromatography and the results were expressed as ionic fraction of CO<sub>3</sub><sup>2-</sup> in the solution and in the solid (mequiv CO<sub>3</sub><sup>2-</sup> / (mequiv CO<sub>3</sub><sup>2-</sup> + mequiv Cl<sup>-</sup>)).

##### 2. Preparation of halide-LDH derivatives

###### *Forward isotherm Cl<sup>-</sup>/F<sup>-</sup>*

To obtain the forward isotherm Cl<sup>-</sup>/F<sup>-</sup> six samples were prepared by equilibrating, under stirring, 600 mg of [Zn<sub>0.61</sub>Al<sub>0.39</sub>(OH)<sub>2</sub>]Cl<sub>0.39</sub>·0.47H<sub>2</sub>O (ion exchange capacity of 3.65 mequiv/g) with 2.2, 4.4, 8.8, 13.1, 17.5, 22.0 ml of 0.1 M of NaF aqueous solution for 7 days at 25°C.

###### *Forward isotherm Cl<sup>-</sup>/Br<sup>-</sup>*

To obtain the forward isotherm Cl<sup>-</sup>/Br<sup>-</sup> ten samples were prepared by equilibrating, under stirring, 600 mg of [Zn<sub>0.61</sub>Al<sub>0.39</sub>(OH)<sub>2</sub>]Cl<sub>0.39</sub>·0.47H<sub>2</sub>O with 4.2, 6.9, 9.7, 12.5, 15.3, 18.4, 23.6, 27.8, 200, 250 ml of 0.1 M of NaBr aqueous solution for 7 days at 25°C.

###### *Reverse isotherm Cl<sup>-</sup>/Br<sup>-</sup>*

To obtain the reverse isotherm Cl<sup>-</sup>/Br<sup>-</sup> six samples were prepared by equilibrating, under stirring, 600 mg of [Zn<sub>0.61</sub>Al<sub>0.39</sub>(OH)<sub>2</sub>]Br<sub>0.39</sub>·0.52H<sub>2</sub>O (ion exchange capacity of 3.12 mequiv/g) with 5, 10, 15, 20, 30, 60 ml of 0.1 M of NaCl aqueous solution for 7 days at 25°C.

###### *Forward isotherm Cl<sup>-</sup>/I<sup>-</sup>*

To obtain the forward isotherm Cl<sup>-</sup>/I<sup>-</sup> five samples were prepared by equilibrating, under stirring, 600 mg of [Zn<sub>0.61</sub>Al<sub>0.39</sub>(OH)<sub>2</sub>]Cl<sub>0.39</sub>·0.47H<sub>2</sub>O with 2.2, 4.4, 8.8, 13.1, 43.8 ml of 0.1 M of NaI aqueous solution for 7 days at 25°C.

The solids were recovered by centrifugation, washed three times with CO<sub>2</sub>-free deionized water and dried at 75% RH. The content of halide (X<sup>-</sup> = fluoride, bromide and iodide) and chloride in the solids were measured by ion chromatography and the results were expressed as X<sup>-</sup> molar fraction in the solution and in the solid (mequiv. X<sup>-</sup>/(mequiv. X<sup>-</sup> + mequiv. Cl<sup>-</sup>)).

### TG and DTA analysis

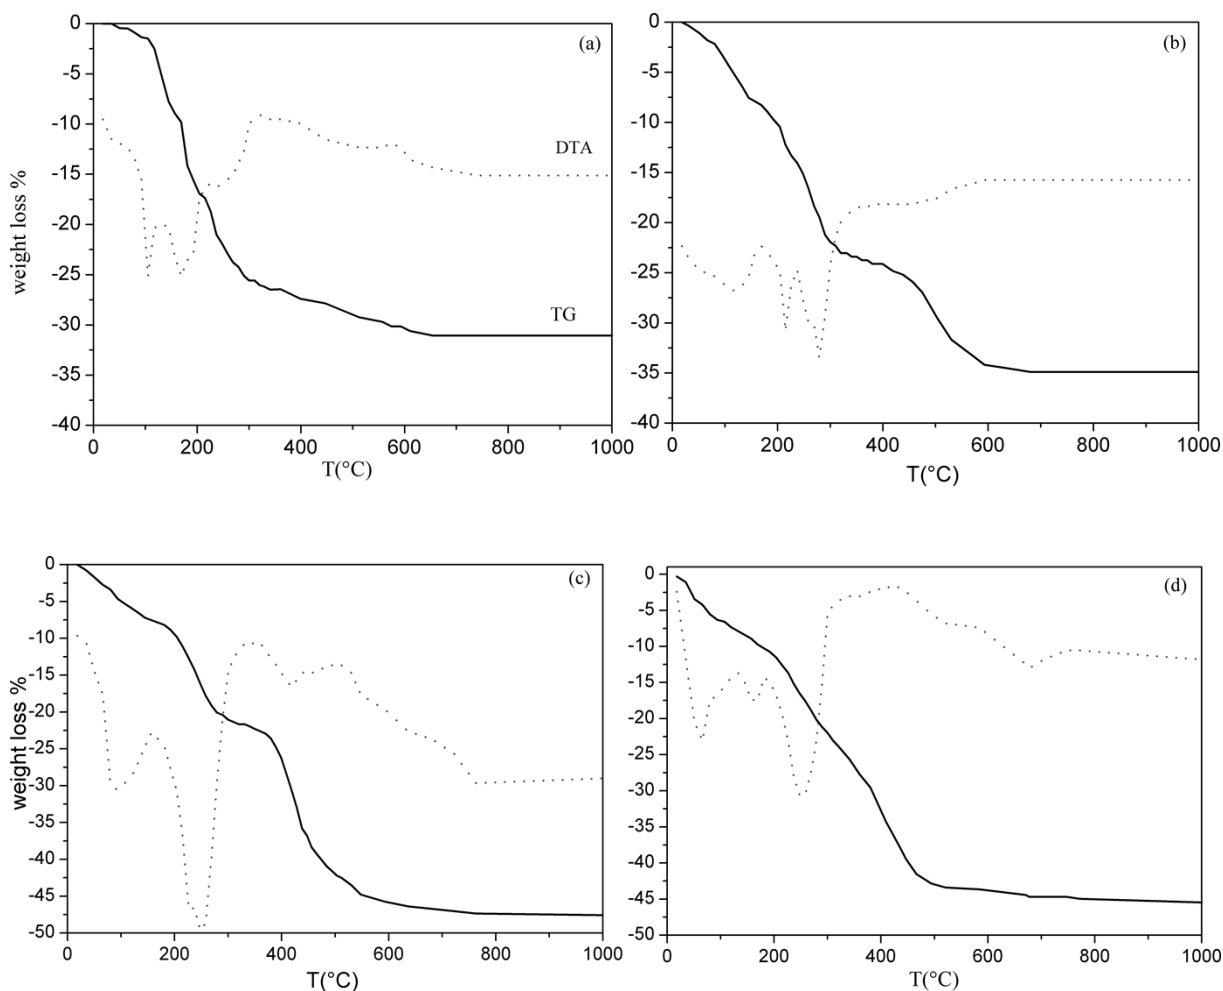

TG and DTA curves of ZnAl-F (a), ZnAl-Cl (b), ZnAl-Br (c) and ZnAl-I (d) of Table 2. Atmosphere: air flow 30 ml/min and heating rate of 10°C/min.
